# Supplementary material for: Multimodality Imaging Evaluation to Detect Subtle Right Ventricular Involvement in Patients with Acute Myocarditis and Preserved Left Ventricular Ejection Fraction
Source: MDPI journal article supplement (doi:10.3390/jcm12134308), 2023-06-27
Supplement: s1 [file s1]

|                                        |           | <i>All Myocarditis</i> | <i>IL-MY</i> | <i>noIL-MY</i> | <i>P value</i> |
|----------------------------------------|-----------|------------------------|--------------|----------------|----------------|
|                                        |           | <i>N=54</i>            | <i>N= 34</i> | <i>N= 20</i>   |                |
| <b><i>Clinical Characteristics</i></b> |           |                        |              |                |                |
| Age (years)                            | mean ± SD | 36.6±17.3              | 36.2 ±17.2   | 37.22±17.7     | 0.852          |
| Males                                  | n (%)     | 49 (92.2)              | 32 (92.1)    | 17 (94.4)      | 0.962          |
| Body Surface Area (m <sup>2</sup> )    | mean ± SD | 1.90±0.16              | 1.94±0.18    | 1.84±0.14      | 0.065          |
| Dyslipidemia                           | n (%)     | 9 (17.3)               | 6 (17.6)     | 3 (16.7)       | 0.929          |
| Arterial Hypertension                  | n (%)     | 4 (7.7)                | 3 (8.8)      | 1 (5.6)        | 0.962          |
| Diabetes                               | n (%)     | 2 (3.8)                | 0 (0)        | 2 (11.1)       | 0.165          |
| Current smoker                         | n (%)     | 18 (34.6)              | 12 (35.3)    | 6 (33.3)       | 0.570          |
| Familiarity                            | n (%)     | 7 (13.5)               | 5 (14.7)     | 2(11.1)        | 0.718          |
| History of CAD                         | n (%)     | 2 (3.8)                | 2 (5.9)      | 0 (0)          | 0.294          |
| <b><i>Clinical presentation</i></b>    |           |                        |              |                |                |
| Chest pain                             | n (%)     | 51 (98.1)              | 34 (100)     | 17 (94.4)      | 0.165          |
| Fever                                  | n (%)     | 33 (63.5)              | 23 (67.6)    | 10 (55.6)      | 0.389          |
| Palpitation                            | n (%)     | 10 (19.2)              | 5 (14.7)     | 5 (27.8)       | 0.255          |
| Dyspnea                                | n (%)     | 31 (59.6)              | 20 (58.8)    | 11 (61.1)      | 0.873          |
| <b><i>ECG</i></b>                      |           |                        |              |                |                |
| ECG abnormalities                      | n (%)     | 41 (78.8)              | 27 (79.4)    | 14 (77.8)      | 0.728          |

|                                        |              |                     |                  |                   |       |
|----------------------------------------|--------------|---------------------|------------------|-------------------|-------|
| Negative T-wave                        | n (%)        | 10 (19.2)           | 7 (20.6)         | 3 (16.7)          | 0.523 |
| ST-elevation,                          | n (%)        | 34 (65.4)           | 22 (64.7)        | 12 (66.7)         | 1.0   |
| <b><i>Laboratory testing</i></b>       |              |                     |                  |                   |       |
| Leukocytes (10 <sup>3</sup> cells/ml), | median (IQR) | 7.1 (3.4-11.8)      | 7.1 (2.9-10.7)   | 7.9 (4.1-12.3)    | 0.451 |
| Troponine I peak ng/ml,                | median (IQR) | 1785.5 [742-8319.5] | 1546 [832-8279]  | 3850 [426-8777.5] | 0.773 |
| CRP mg/dl,                             | median (IQR) | 55 [28-73.5]        | 55.5 [23.5-76.7] | 54 [34.2-65.5]    | 0.571 |

**Table S1 Supplementary Materials:** clinical characteristics of patient with myocarditis.

MY, acute myocarditis; LGE, late gadolinium enhancement; SD, standard deviation; CAD, coronary artery disease; IQR, interquartile range; CRP, C- reactive protein.

## **Supplementary Materials: baseline characteristics and clinical indication for CMR of control population**

### **Intra- and inter-observer reproducibility of CMR-FT and 2D TTE speckle tracking measurements:**

Intra-observer ( $r=0.85$ ,  $p<0.001$ /Mean difference 1.23% –95% levels of agreement— -18.12% to -21.71% ms) and inter-observer ( $r=0.91$ ,  $p<0.001$ /Mean difference 1.78% ms–95% levels of agreement— -19.01 to 23.71%) reproducibility for CMR RV FWS was excellent. Intra-observer ( $r=0.65$ ,  $p=0.003$ /Mean difference 1.23% –95% levels of agreement— -18.12% to -23.42% ms) and inter-observer ( $r=0.91$ ,  $p<0.001$ /Mean difference 1.78% ms–95% levels of agreement— -19.01 to 24.48%) reproducibility for CMR LV GLS was excellent. Intra-observer ( $r=0.71$ ,  $p=0.004$ /Mean difference 2.41% –95% levels of agreement— -16.22% to -24.41% ms) and inter-observer ( $r=0.84$ ,  $p=0.005$ /Mean difference 1.18% ms–95% levels of agreement— -17.14 to 22.42%) reproducibility for 2D TTE LV GLS was good.
